# Supplementary material for: Efficient low-cost preparation of trans-cyclooctenes using a simplified flow setup for photoisomerization
Source: PubMed Central journal article supplement (PMC4785212; doi:10.1007/s00706-016-1668-z), 2016-02-22

## Supporting Information

### Efficient low-cost preparation of *trans*-cyclooctenes using a simplified flow setup for photoisomerization

Dennis Svatunek<sup>1,2</sup> • Christoph Denk<sup>1</sup> • Veronika Rosecker<sup>1</sup> • Barbara Sohr<sup>1</sup> • Christian Hametner<sup>1</sup>  
• Günter Allmaier<sup>2</sup> • Johannes Fröhlich<sup>1</sup> • Hannes Mikula<sup>1</sup>

---

✉ Hannes Mikula

hannes.mikula@tuwien.ac.at

<sup>1</sup> Institute of Applied Synthetic Chemistry, TU Wien, Vienna, Austria

<sup>2</sup> Institute of Chemical Technologies and Analytics, TU Wien, Vienna, Austria

## Flow reactor

**Fig. S1** Flow photoreactor; 1) 55W OSRAM HNS 90 cm T8 OFR lamps; 2) Quartz tube

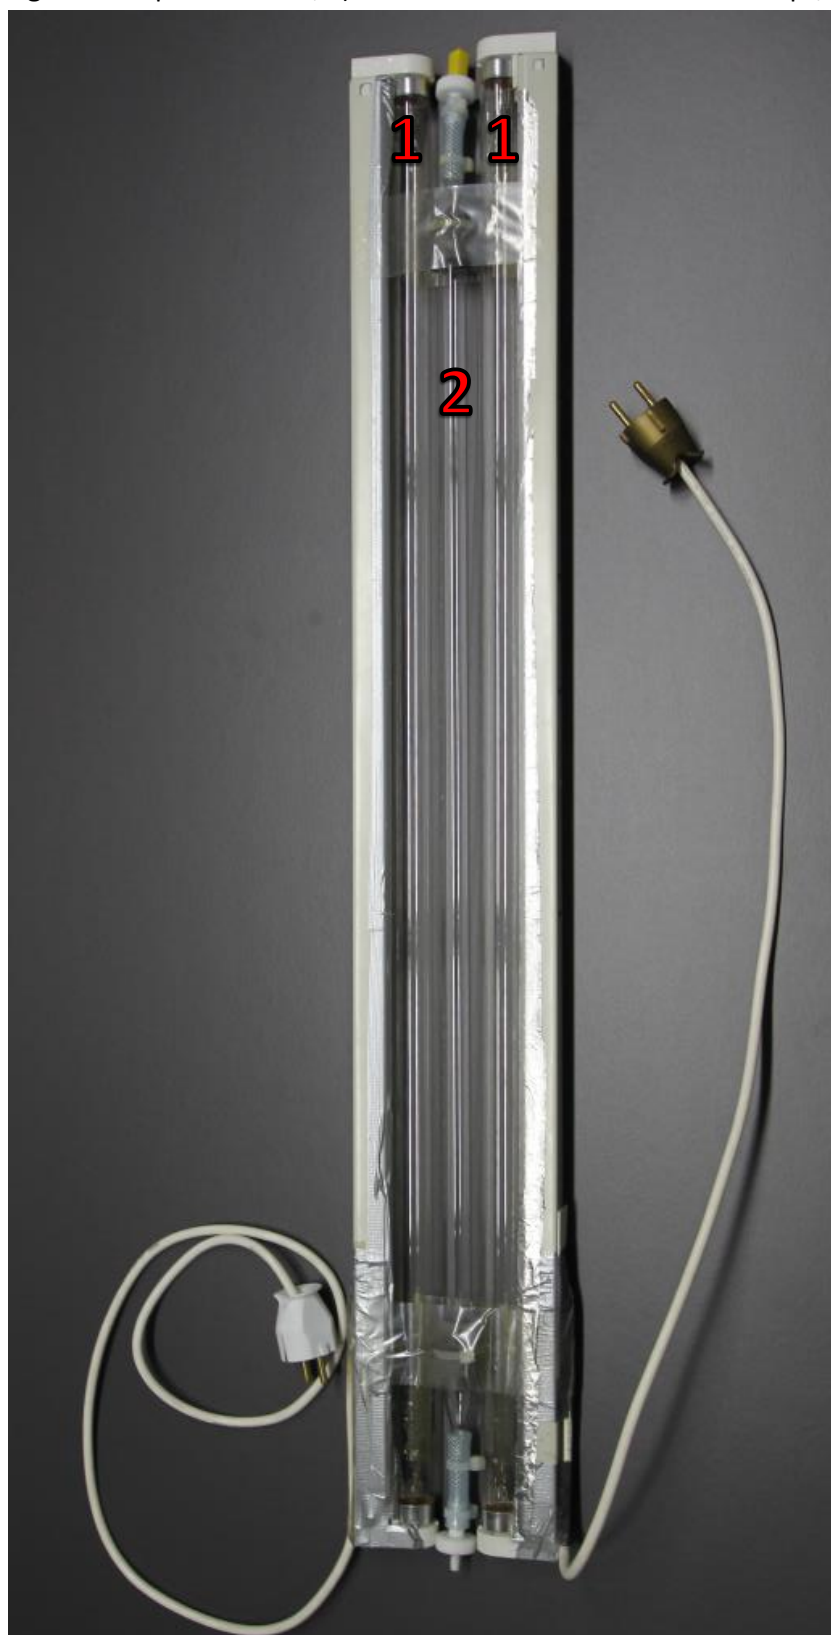

## Photoisomerization setup

**Fig. S2** Photoisomerization setup; **1**: Reservoir flask equipped with condenser and cooled with ice water; **2**) BESTA HPLC HD 2-2000 pump; **3**) Column filled with silica gel topped by  $\text{AgNO}_3$  on silica gel (10%) ; **4**) Flow photo reactor

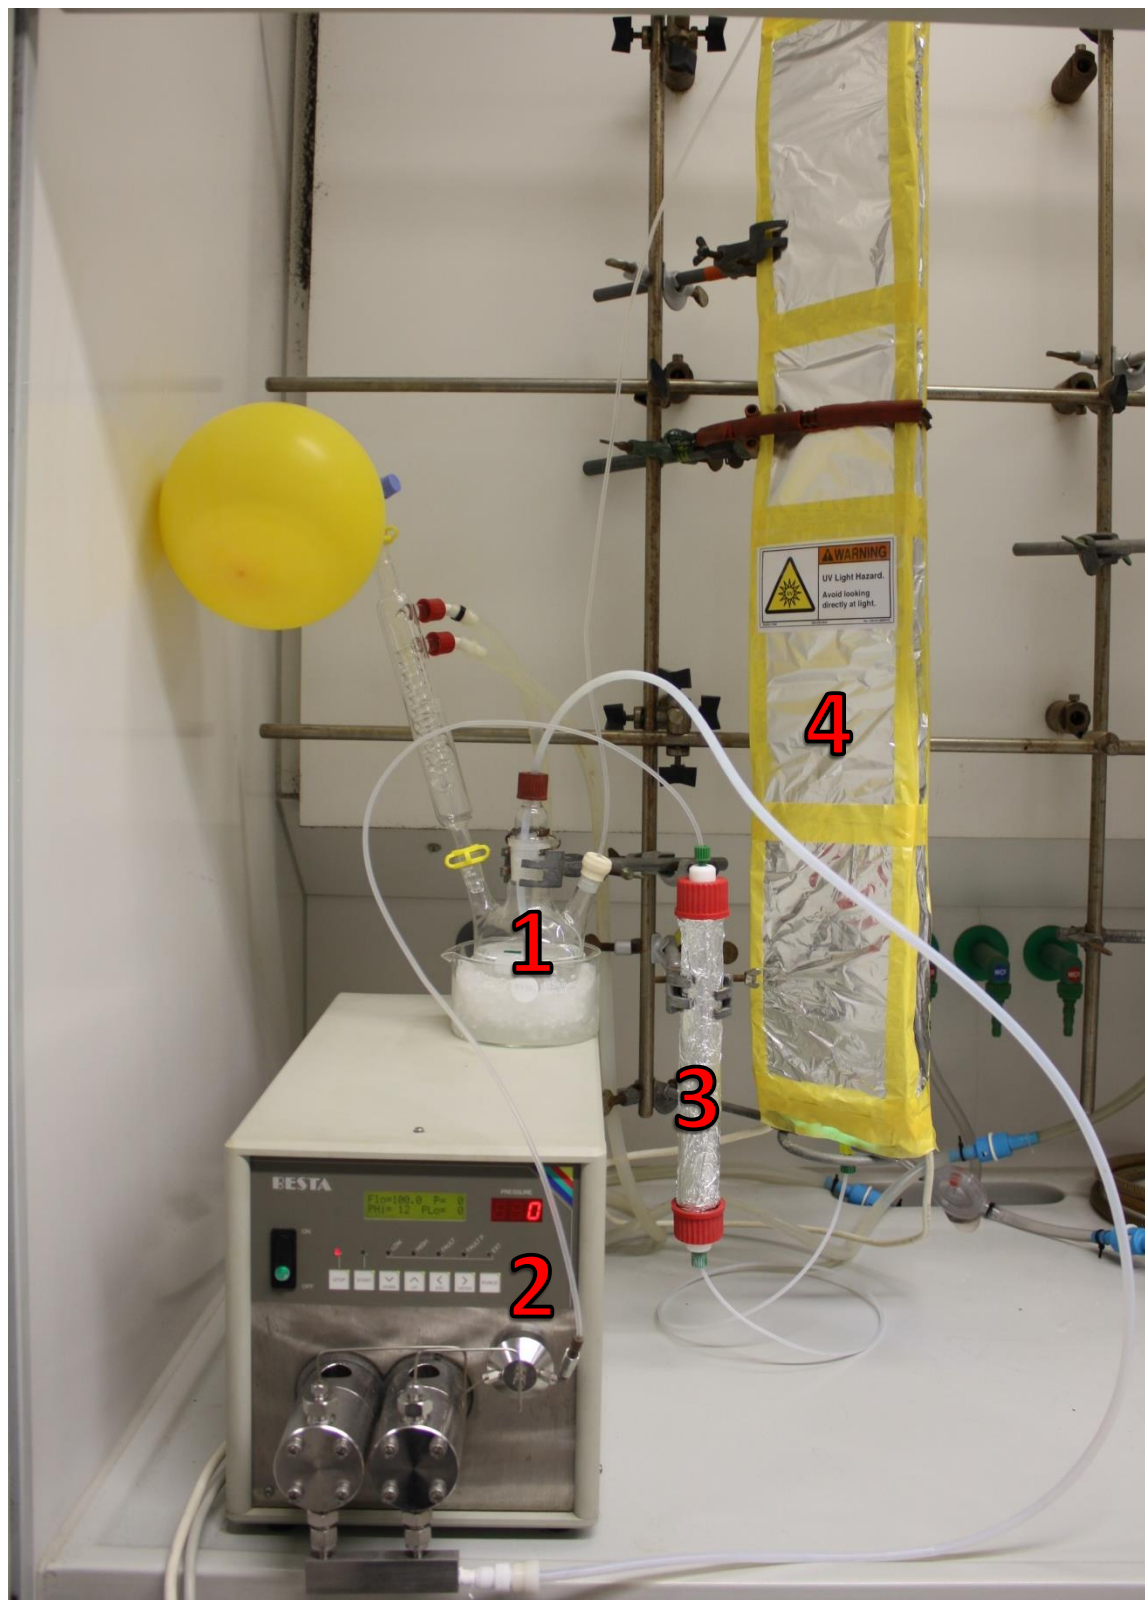

Supplement: 706_2016_1668_MOESM1_ESM.pdf [file 706_2016_1668_MOESM1_ESM.pdf]
